# Supplementary material
Source: HighWire-hosted journal article supplement (https://jnm.snmjournals.org/highwire/filestream/102918/field_highwire_adjunct_files/0/257303_Supplemental_Data.pdf)

**Supplemental Table 1:** Bias assessment using QUADAS-2

| First Author | Year | Risk of Bias      |            |                    |                 | Applicability     |            |                    |
|--------------|------|-------------------|------------|--------------------|-----------------|-------------------|------------|--------------------|
|              |      | Patient Selection | Index Test | Reference Standard | Flow and Timing | Patient Selection | Index Test | Reference Standard |
| Alharbi      | 2018 | High              | Low        | Low                | Low             | Low               | Low        | Low                |
| Amadou       | 2019 | High              | Low        | Low                | Low             | Low               | Low        | Low                |
| Bossert      | 2019 | Low               | Low        | Low                | Unclear         | Low               | Low        | Low                |
| Broos        | 2019 | Low               | Low        | Low                | Unclear         | Low               | Low        | Low                |
| Christakis   | 2019 | Low               | Low        | Low                | Unclear         | Unclear           | Low        | Low                |
| Fischli      | 2017 | Unclear           | Unclear    | Low                | High            | Low               | Low        | Low                |
| Grimaldi     | 2018 | Unclear           | Low        | Low                | High            | Low               | Low        | Low                |
| Hocevar      | 2016 | Low               | Unclear    | Low                | Low             | Low               | Low        | Low                |
| Huber        | 2018 | Unclear           | Unclear    | Low                | Low             | Low               | Low        | Low                |
| Khafif       | 2019 | Low               | Low        | Low                | Unclear         | Low               | Low        | Low                |
| Kluijfhout   | 2017 | Unclear           | Low        | Low                | Low             | Low               | Low        | Low                |
| Kluijfhout   | 2016 | Unclear           | Unclear    | Low                | Low             | Low               | Low        | High               |
| Lezaic       | 2014 | Low               | Low        | Low                | Low             | Low               | Low        | Low                |
| López-Mora   | 2020 | Low               | High       | Low                | Unclear         | Low               | High       | Low                |
| Michaud      | 2014 | Unclear           | Low        | Low                | Low             | Low               | Low        | Low                |
| Piccardo     | 2019 | Low               | Low        | Low                | Unclear         | Low               | High       | Low                |
| Quak         | 2018 | Unclear           | Low        | Low                | Low             | Low               | Low        | Low                |
| Thanseer     | 2018 | Low               | Low        | Low                | Low             | Low               | Low        | Low                |
| Uslu-Bešli   | 2020 | Unclear           | Low        | Low                | Low             | Low               | Low        | Low                |
| Zajčková     | 2019 | Unclear           | Low        | Low                | Unclear         | Low               | Low        | Low                |

**Supplemental Figure 1:** Summary of sensitivity, specificity, and hierarchical summary receiver-operating-characteristic (HSROC) plot of sensitivity/specificity for FCH vs. pathology in studies reporting primary hyperparathyroidism only. Effect size for sensitivity and specificity was 0.94 (95% CI, 0.92–0.97) and 0.14 (95% CI, -0.08–0.36), respectively. Size of circles represents size of individual studies.

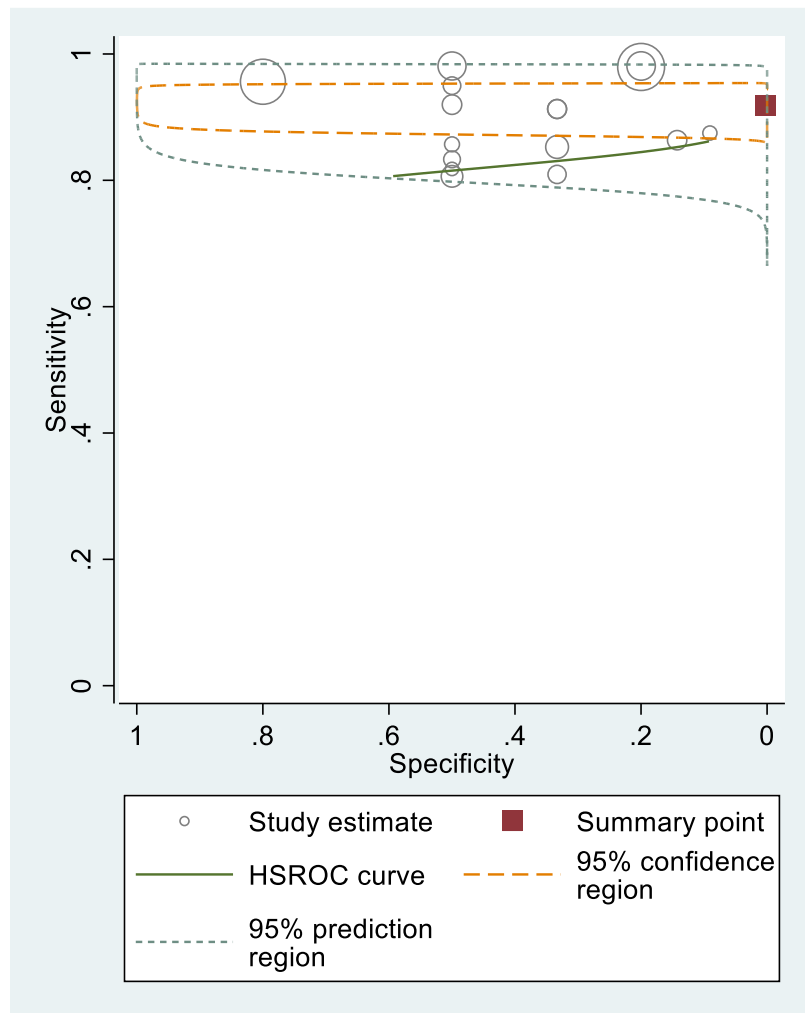

**Supplemental Figure 2: Effect Size for FCH vs Pathology Sensitivity**

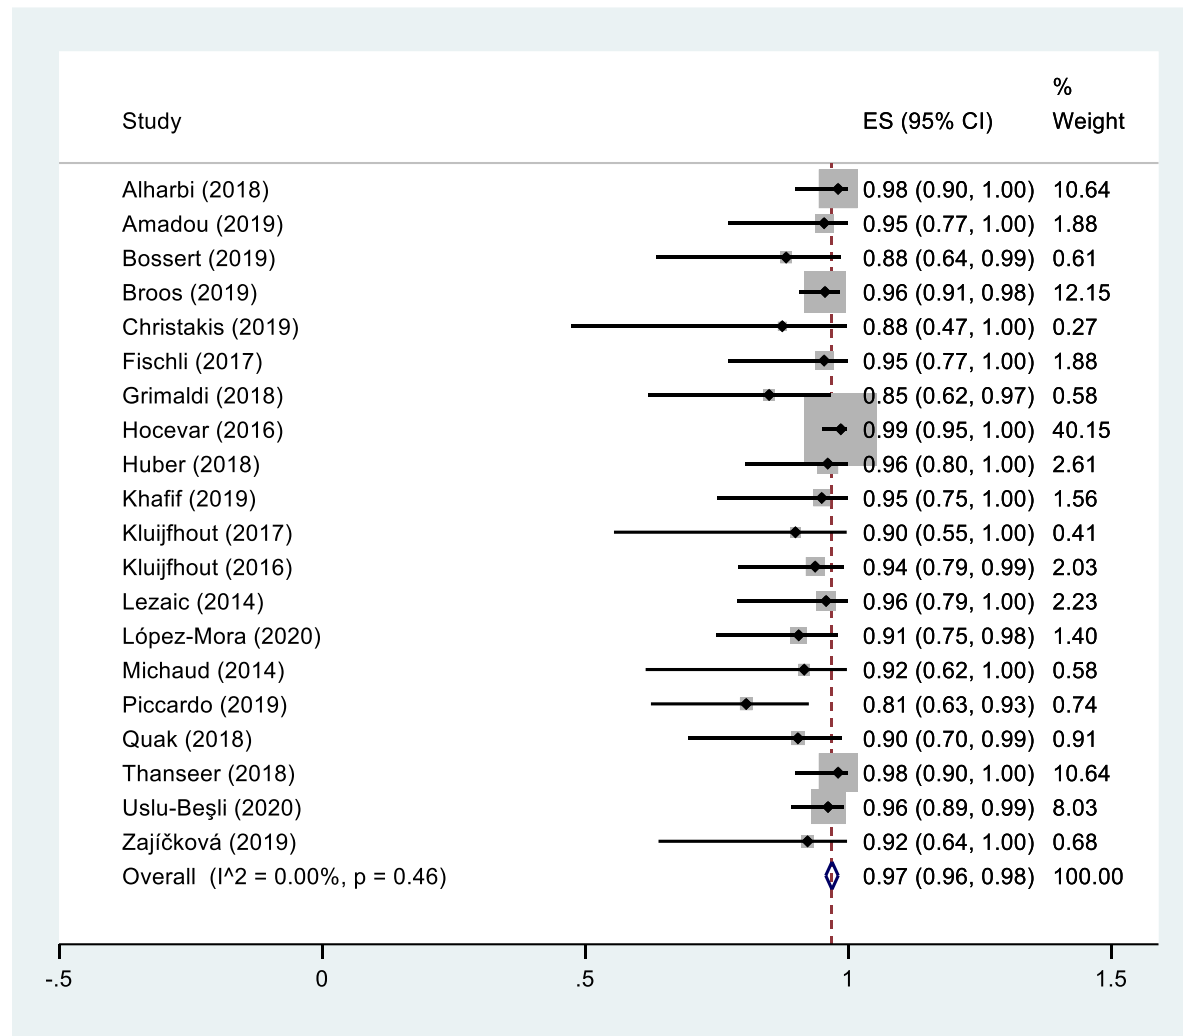

Supplement: 257303_Supplemental_Data.pdf [file 257303_Supplemental_Data.pdf]
